# Supplementary material
Source: Research Square preprint supplement (doi:10.21203/rs.3.rs-9044457/v1)
Supplement: Supplementary file 1 [file 8812530b3ceacc3f7d989082.docx]

**Table 1. Participants’ Characteristics**

| **Characteristics** | **Frequency (%)** |
| --- | --- |
| **Age**  20 – 39 years  30 – 39 years  40 – 49 years  **Gender**  Male  Female  ***Practice Related Characteristics***  General Practitioner  Family medicine  Resident  Pediatrician  Internal medicine  Emergency medicine  ***Clinical Practice Experience***  1 -3 years  4 – 6 years  7 – 10 years  >10 years  ***No of asthmatic patients per week***  <10  ≥10  **Postgraduate Training**  Yes  No  ***Asthma specialist training in the last 3 years***  Yes  No  ***Level of adherence to guideline***  Good  Poor | 38 (25.9)  101 (68.7)  8 (5.4)  122 (83.0)  25 (17.0)  116 (78.9)  1 (0.7)  11 (7.5)  10 (6.8)  7 (4.8)  2 (1.4)  58 (39.5)  37 (25.2)  36 (24.5)  16 (10.9)  130 (88.4)  17 (11.6)  56 (38.1)  91 (61.9)  43 (29.3)  104 (70.7)  80 (54.4%)  67 (45.6%) |

**Table 2: Attitude of health providers towards asthma management guidelines in Somaliland**

| **Statement** | **Agree**  **n (%)** | **Neutral**  **n (%)** | **Disagree**  **n (%)** |
| --- | --- | --- | --- |
| Following guideline improve patients’ outcomes  International guideline is applicable in my local setting  Guidelines are too complex for routine consultations  I trust recommendations in the current guideline  Adhering to guideline is time consuming  Patient preferences prevent me from following guidelines  Medication costs prevent me from guideline-concordant prescribing  I receive adequate organisation support to follow guidelines | 132 (89.8)  103 (70.1)  34 (23.1)  124 (84.4)  44 (29.9)  58 (39.5)  78 (53.1)  32 (21.8) | 2 (1.4)  28 (19.0)  15 (10.2)  13 (8.8)  23 (15.6)  26 (17.7)  32 (21.8)  22 (15.0) | 13 (8.8)  16 (10.9)  98 (66.7)  10 (6.8)  80 (54.4)  63 (42.9)  36 (24.5)  93 (63.3) |

**Table 3: Logistic Regression of Predictors of Guideline Adherence among Providers in Somaliland**

| **Predictor** | **Adjusted OR** | **95% CI** | **P-value** |
| --- | --- | --- | --- |
| Good knowledge of asthma  Age less than 30 years  Male gender  Specialist medical profession  Less than 10 patients per week  Postgraduate training  Positive attitude to guideline use  Positive self-efficacy in practice  Less than 7 years’ experience | 1.717  1.047  1.291  1.213  0.817  1.063  0.910  0.788  1.168 | 0.888 – 3.320  0.498 – 2.199  0.548 – 3.039  0.458 – 3.216  0.293 – 2.278  0.544 – 2.075  0.413 – 2.003  0.432 – 1.439  0.593 – 2.302 | 0.107  0.904  0.558  0.697  0.698  0.858  0.814  0.438  0.653 |

**Table 4.0: Mapping of study findings to Consolidated Framework for Implementation Research (CFIR) domains**

| **CFIR Domains** | **CFIR Constructs** | **Determinants identified in the study** | **Evidence from study findings** |
| --- | --- | --- | --- |
| Intervention characteristics | Evidence strength and quality  Relative advantage  Complexity | High trust in asthma management guidelines  Perceived benefit of guideline-based care  Some providers perceive guidelines as complex for routine use | 84.4% of providers reported trusting recommendations in current asthma guidelines  89.8% agreed that following asthma management guidelines improves patient outcomes  23.1% reported that guidelines are too complex to use during routine consultations |
| Outer setting | Patient needs and resources  Patient needs and resources  Patient preferences | Patient adherence challenges  Medication affordability constraints  Patient expectations influencing clinical decision-making | 83.0% reported poor patient adherence to prescribed therapy as a barrier  61.2% indicated that patients’ inability to afford controller medications limits guideline adherence  39.5% reported that patient preferences prevent them from following guidelines |
| Inner setting | Structural characteristics  Available resources  Available resources  Implementation climate  Compatibility | Limited diagnostic infrastructure  Limited availability of inhaler devices  Lack of specialized staff support  Limited organizational support  Guidelines perceived as applicable to local clinical settings | 78.3% reported lack of diagnostic tools (e.g., spirometry or PEF meters) as a barrier  73.5% reported limited access to inhaler devices or formulations  76.8% reported lack of asthma educators or trained nurses  Only 21.8% reported receiving adequate organizational support to follow guidelines  70.1% agreed international asthma guidelines are applicable in their setting |
| Characteristics of Individuals | Knowledge and beliefs about the intervention  Self-efficacy  Individual attitudes | Generally good knowledge of asthma management  Moderate to high confidence in asthma management tasks  Positive attitudes toward guideline use | 57% demonstrated good knowledge of asthma management  61% reported moderate self-efficacy and practice behaviours, 36% reported good self-efficacy  78% of participants reported positive attitudes toward asthma guidelines |
| Implementation Process | Engaging  Executing  Reflecting and evaluating | Training and professional development opportunities  Availability of diagnostic tools and inhaler devices facilitating implementation  Continuing professional education needs | 85.7% identified regular asthma guideline training/workshops as facilitators  74.9% identified availability of spirometry as a facilitator; 83.7% identified inhaler availability  72.1% reported inadequate continuing medical education as a barrier to guideline adherence |
